# Supplementary material for: A bimetallic pillared-layer metal–organic coordination framework with a 3D biporous structure
Source: Royal Society of Chemistry journal article supplement (doi:10.1039/b818498d), 2009-01-01
Supplement: b818498d.pdf [file b818498d.pdf]

## **A bimetallic pillared-layer metal-organic coordination framework with a 3D biporous structure**

**Tapas Kumar Maji,\* Suchetan Pal, K. L. Gurunatha, A. Govindaraj, C. N. R. Rao\***

*Chemistry and Physics of Materials Unit, Jawaharlal Nehru Centre for Advanced Scientific Research, Jakkur, Bangalore- 560 064, India. E-mail: [tmaji@jncasr.ac.in](mailto:tmaji@jncasr.ac.in)*

### **Experimental section**

**Synthesis of  $\{[\text{Mn}_3(4,4'\text{-bipy})_3(\text{H}_2\text{O})_4][\text{Fe}(\text{CN})_6]_2 \cdot 2(4,4'\text{-bipy}) \cdot 3(\text{H}_2\text{O})\}_n$  (1):** An aqueous solution (12.5 mL) of  $\text{K}_3\text{Fe}(\text{CN})_6$  (0.25 mmol, 0.0426 g) was added to an ethanolic solution (12.5 mL) of 4,4'-bipyridyl (0.25 mmol, 0.039 g) and stirred for 30 min.  $\text{MnCl}_2 \cdot 4\text{H}_2\text{O}$  (0.25 mmol, 0.0494 g) was dissolved in 12.5 ml distilled water and 2.5 mL of this metal solution was carefully layered with the 2.5 mL of mixed 4,4'-bipyridyl and  $\text{K}_3\text{Fe}(\text{CN})_6$  solution using a ethanol : water buffer solution (1 mL) in a crystal tube. After 15 days brown square blocks were appeared in the middle of the tube and separated and washed with ethanol (Yield : ~ 60 %). The bulk amount of the sample was prepared by the direct mixing of the reagents in ethanol / water mixed solution with stirring for 24 h and the phase purity was checked with the PXRD. This powdered sample was used for characterization of different physical properties. IR:  $\nu(\text{C}\equiv\text{N})$  2067  $\text{cm}^{-1}$  and 2129  $\text{cm}^{-1}$ ;  $\nu(\text{C}=\text{C})$ : 1610  $\text{cm}^{-1}$ , 1540  $\text{cm}^{-1}$ ;  $\nu(\text{O}-\text{H})$ : 3481  $\text{cm}^{-1}$  and 3571  $\text{cm}^{-1}$ . Anal. calcd. for  $\text{C}_{62}\text{H}_{54}\text{Fe}_2\text{Mn}_3\text{N}_{22}\text{O}_7$ : C, 49.74; H, 3.61; N, 20.59. Found: C, 48.68; H, 3.31; N, 20.66%.

**Physical Measurement:** Powder XRD pattern of the products were recorded by using Cu-K $\alpha$  radiation (Bruker D8 Discover; 40 kV, 30 Ma). The pattern was agreed with those calculated from single crystal structure determination. Thermogravimetric analysis (TGA) was carried out (Metler Toledo) in nitrogen atmosphere (flow rate = 50 ml min<sup>-1</sup>) in the temperature range 25 – 500 °C (heating rate = 2°C min<sup>-1</sup>). Infra-red (IR) spectroscopic studies was carried out in the mid-IR region as KBr pellet (Bruker IFS-66v). Magnetic studies were performed on a 5 mg batch of crystalline sample using Vibrating Sample Magnetometer (VSM) in physical property measurement system (PPMS, Quantum Design, USA).

**X-ray Single crystal Measurement:** A brown color square block single crystal of the compound **1** was carefully selected under a polarizing microscope and fixed to a thin glass fiber by commercially available glue. X-ray single crystal structural data was collected by a Bruker Smart –CCD diffractometer equipped with a normal focus, 2.4 kW sealed tube X-ray source (MoK $\alpha$  radiation, 0.71073 Å) operating at 50 kV and 30 mA. An empirical absorption correction based on symmetry equivalent reflections was applied using the SADABS program. Some hydrogen atoms were geometrically placed, but most of them were located by the Fourier difference synthesis. The hydrogen atoms on the guest water molecules could not be located. Final refinement included atomic positions for all the atoms, anisotropic thermal parameters for all the non hydrogen atoms, isotropic thermal parameters for the hydrogen atoms. All calculations were carried out using SHELXL-97, SHELXS-97, PLATON-99 and WinGX programme (Ver-1.64). The selected bond lengths and angles were given in **Table S2** and **Table S3**, respectively.

**Adsorption Study:** N<sub>2</sub> (77K), CO<sub>2</sub> (195K), and H<sub>2</sub> (77 K) adsorption-desorption isotherms were measured using QUANTACHROME AUTOSORB-1C analyzer. The adsorption of different solvents (like MeOH (293K), H<sub>2</sub>O, EtOH, CH<sub>3</sub>CN and C<sub>6</sub>H<sub>6</sub> (298 K)) were measured in the gaseous state by using BELSORP-aqua-3 analyzer. In all the measurements, in the sample tube adsorbent sample (~100 –150 mg) was placed and prepared at 473 K for about 5 hours under vacuum prior to measurement of the isotherms. The different solvent molecules used to generate the vapor were degassed fully by repeated evacuation. Helium gas at a certain pressure was

introduced in the gas chamber and was allowed to diffuse into the sample chamber by opening a valve. The adsorbate was placed into the sample tube, then the change of the pressure was monitored and the degree of adsorption was determined by the decrease of the pressure at the equilibrium state. All operations were computer-controlled and automatic.

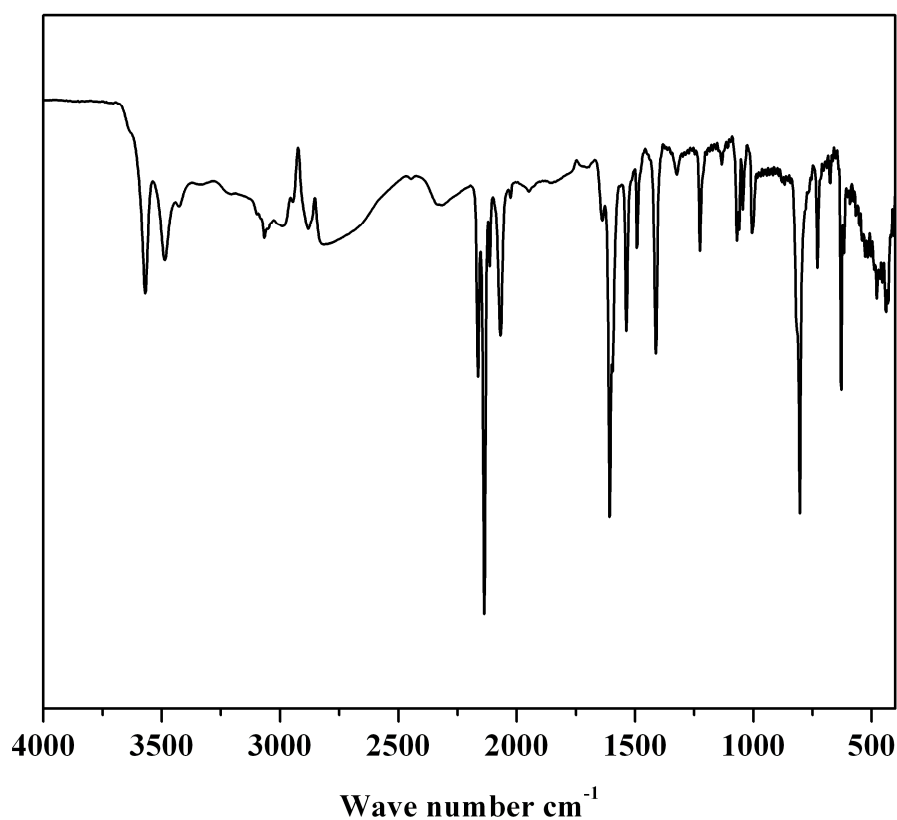

**Fig. S1:** IR spectra of  $\{[\text{Mn}_3(4,4'\text{-bipy})_3(\text{H}_2\text{O})_4][\text{Fe}(\text{CN})_6]_2 \cdot 2(4,4'\text{-bipy}) \cdot 3(\text{H}_2\text{O})\}_n$  (**1**)

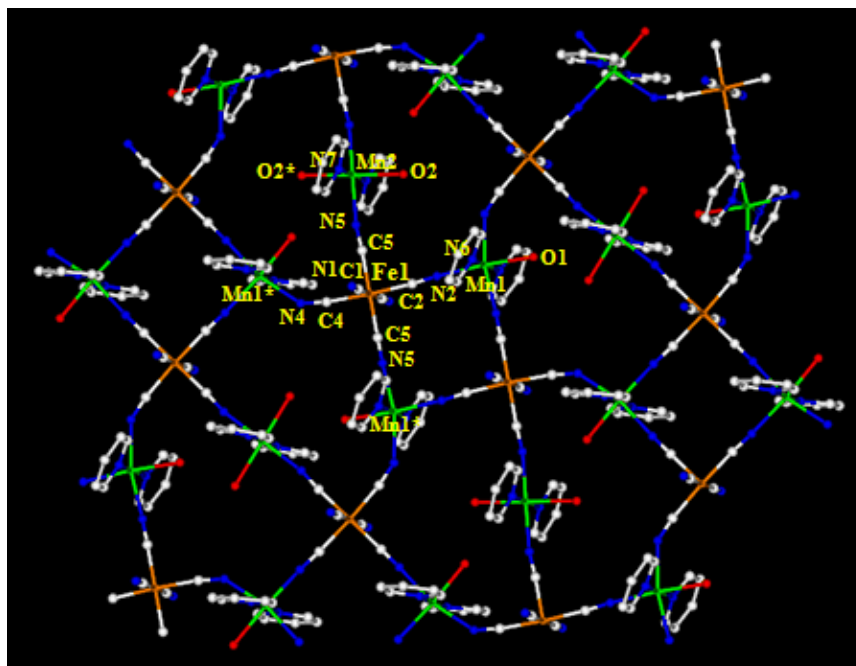

**Fig. S2:** View of the building unit showing the linking of  $\text{Fe}(\text{CN})_6^{3-}$  with  $\text{Mn}(\text{II})$  in 2D layer which is connected by the 4,4'-bipy.

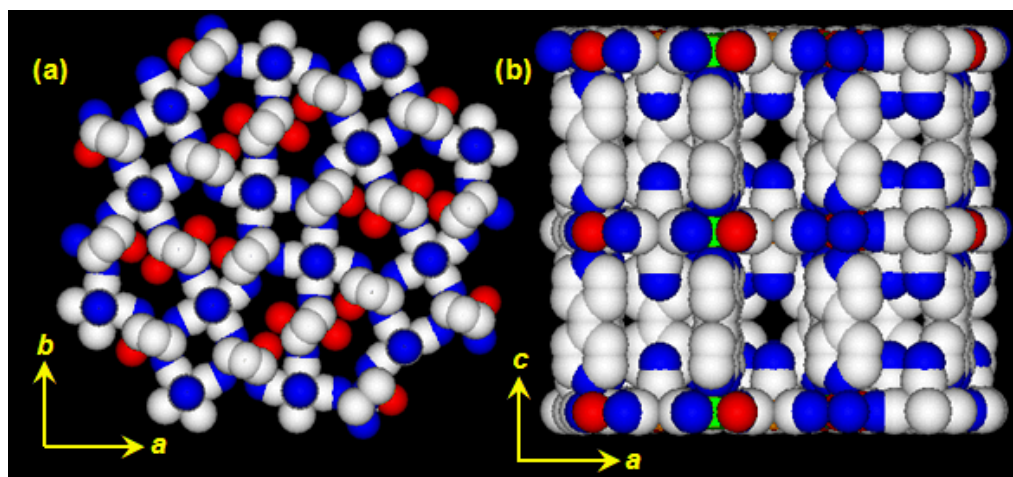

**Fig. S3:** Views of the 3D network of **1** along the crystallographic *c* and *b*-axis respectively.

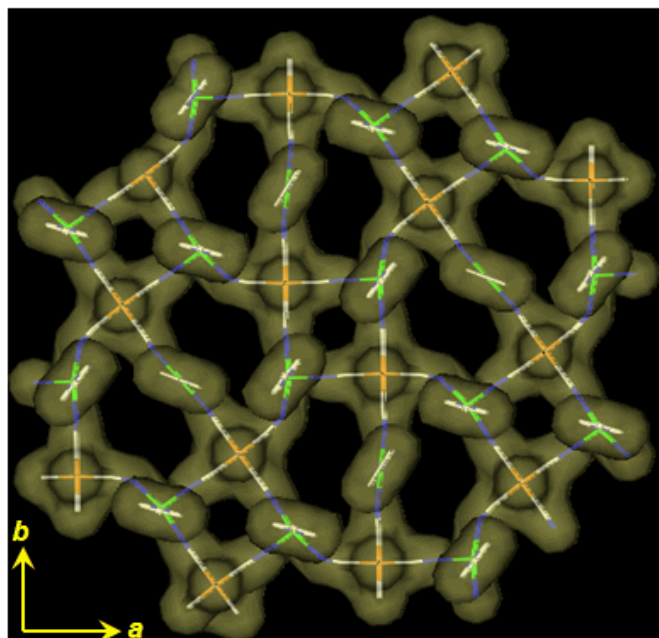

**Fig. S4:** View of the two different pore surfaces.

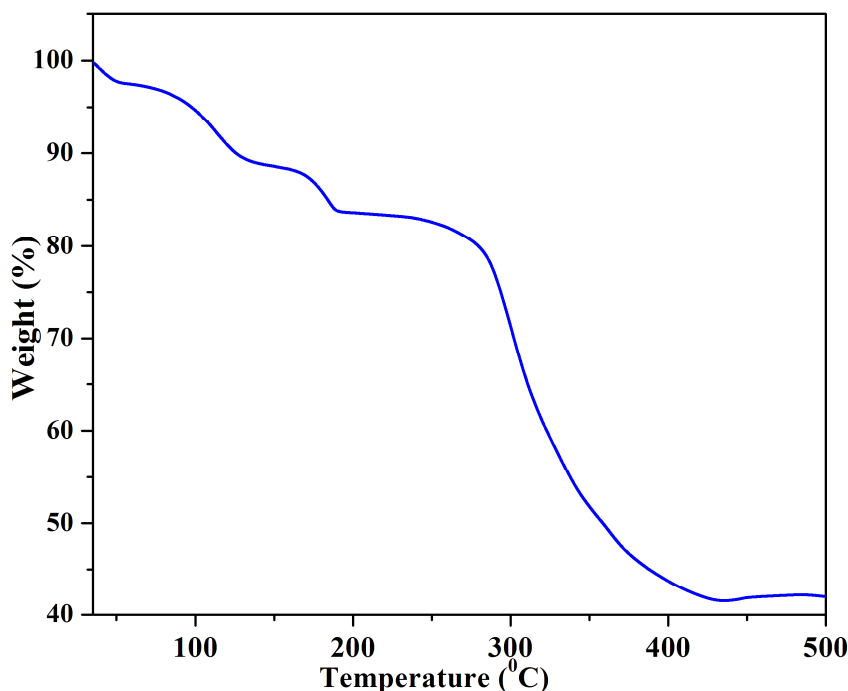

**Fig. S5:** TGA analysis of  $\{[\text{Mn}_3(4,4'\text{-bipy})_3(\text{H}_2\text{O})_4][\text{Fe}(\text{CN})_6]_2 \cdot 2(4,4'\text{-bipy}) \cdot 3(\text{H}_2\text{O})\}_n$  (**1**) over the temperature range from 25-500°C at heating rate of 2°C/min under the  $\text{N}_2$  atmosphere.

**Description of TGA:** Thermogravimetric analysis (TGA) of freshly prepared powder sample of  $\{[\text{Mn}_3(4,4'\text{-bipy})_3(\text{H}_2\text{O})_4][\text{Fe}(\text{CN})_6]_2 \cdot 2(4,4'\text{-bipy}) \cdot 3(\text{H}_2\text{O})\}_n$  (**1**), shows stepwise release of the guest ( $\text{H}_2\text{O}$  & 4,4'-bipy) and coordinated water molecules. The first step (~30-60 °C) corresponds to the two guest water molecules (calc. 2.43 wt% and obs. 2.67 wt%) of the formula and the volatility of one water molecules (O4, high thermal parameters) of the crystallized solvents contributes the discrepancy in the first step of TGA result. The second step (~85-140°C) corresponds to the release of one 4,4'-bipy (calc. 10.53 wt% and obs. 9.67 wt%) and the third step (~170 - 190°C) suggests the removal of the four coordinated water molecules (calc. 4.86 wt % and obs. 5.21 wt. %). The solid with incomplete removal of 4,4'-bipy stable up to 285°C without further weight loss and upon further heating decomposes to unidentified product. Such phenomenon with incomplete removal of the guest molecules in porous frameworks was recently reported by Rosseinsky *et. al.*<sup>1</sup> For the sorption measurement we have degassed the assynthesized sample at 473 K about five hours under high vacuum ( $10^{-1}$  pa). We have analysed the elemental analysis after pretreatment, which shows the composition of  $\{[\text{Mn}_3(4,4'$

bipy)<sub>3</sub>][Fe(CN)<sub>6</sub>]<sub>2</sub>}\_n (**1'**) suggesting removal of all guest H<sub>2</sub>O and 4,4'-bipy and coordinated water molecules. Anal. calcd. for C<sub>42</sub>H<sub>24</sub>Fe<sub>2</sub>Mn<sub>3</sub>N<sub>18</sub>: C, 47.48; H, 2.26; N, 23.74. Found: C, 46.38; H, 3.02; N, 22.96%.

- 1) J. P. Barrio, J. -N. Rebilly, B. Carter, D. Bradshaw, J. Bacsá, A. Y. Ganin, H. Park, A. Trewin, R. Vaidhyanathan, A. I. Cooper, J. E. Warren, and M. J. Rosseinsky, *Chem. Eur. J.*, 2008, **14**, 4521

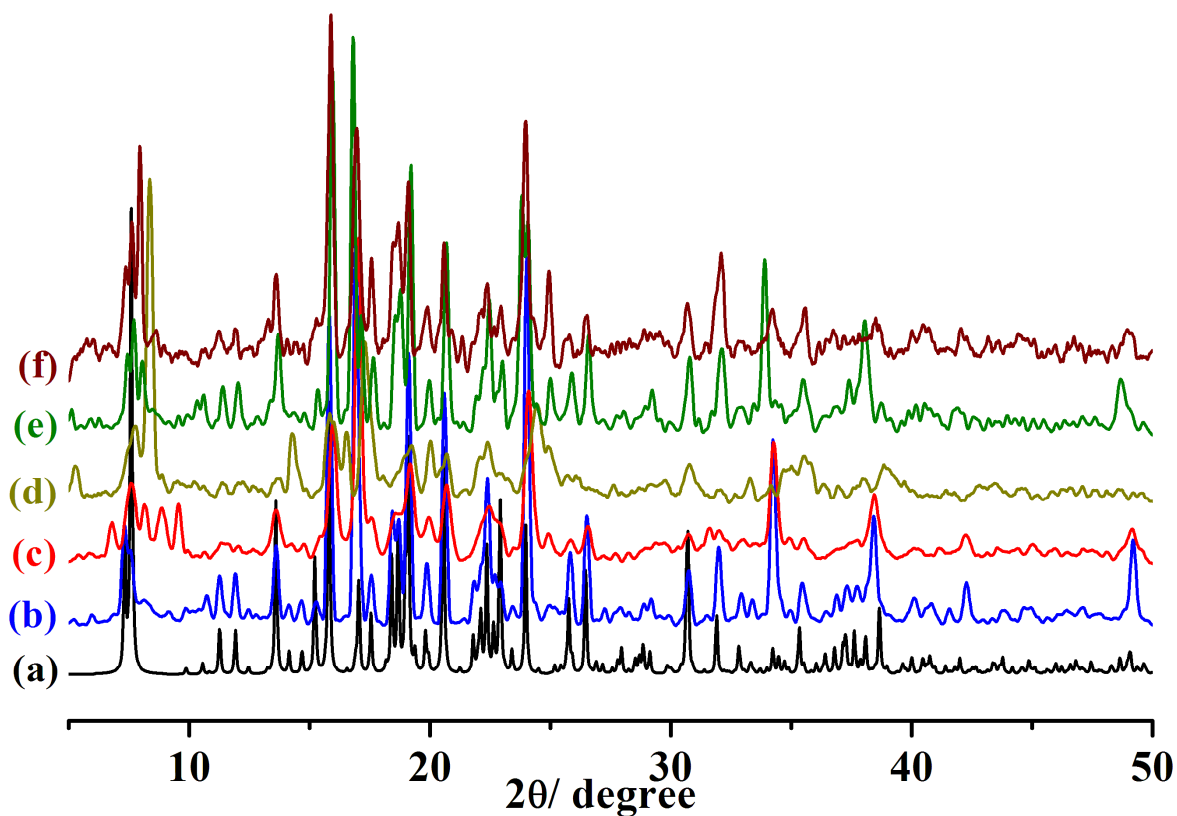

**Fig. S6:** XRPD patterns of  $\{[\text{Mn}_3(4,4'\text{-bipy})_3(\text{H}_2\text{O})_4][\text{Fe}(\text{CN})_6]_2 \cdot 2(4,4'\text{-bipy}) \cdot 3(\text{H}_2\text{O})\}_n$  (**1**) at different states. (a) Simulated; (b) as-synthesized; (c) at 190°C under vacuum; (d) exposed to the water vapor; (e) exposed to MeOH vapor and (f) exposed with EtOH vapor.



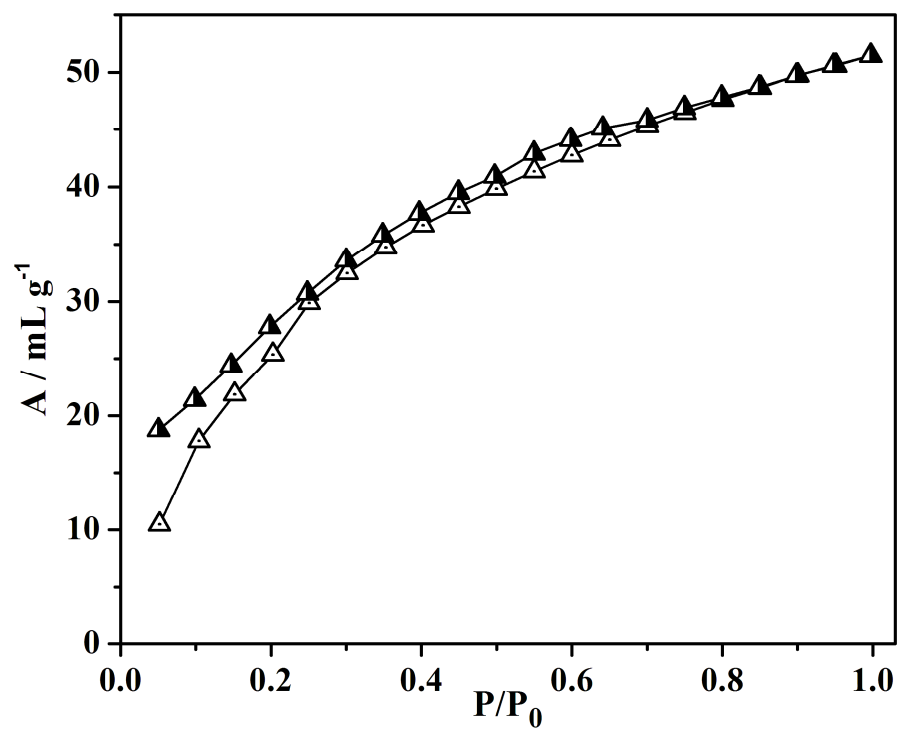

Fig. S7; Adsorption isotherm of H<sub>2</sub> at 77 K for 1

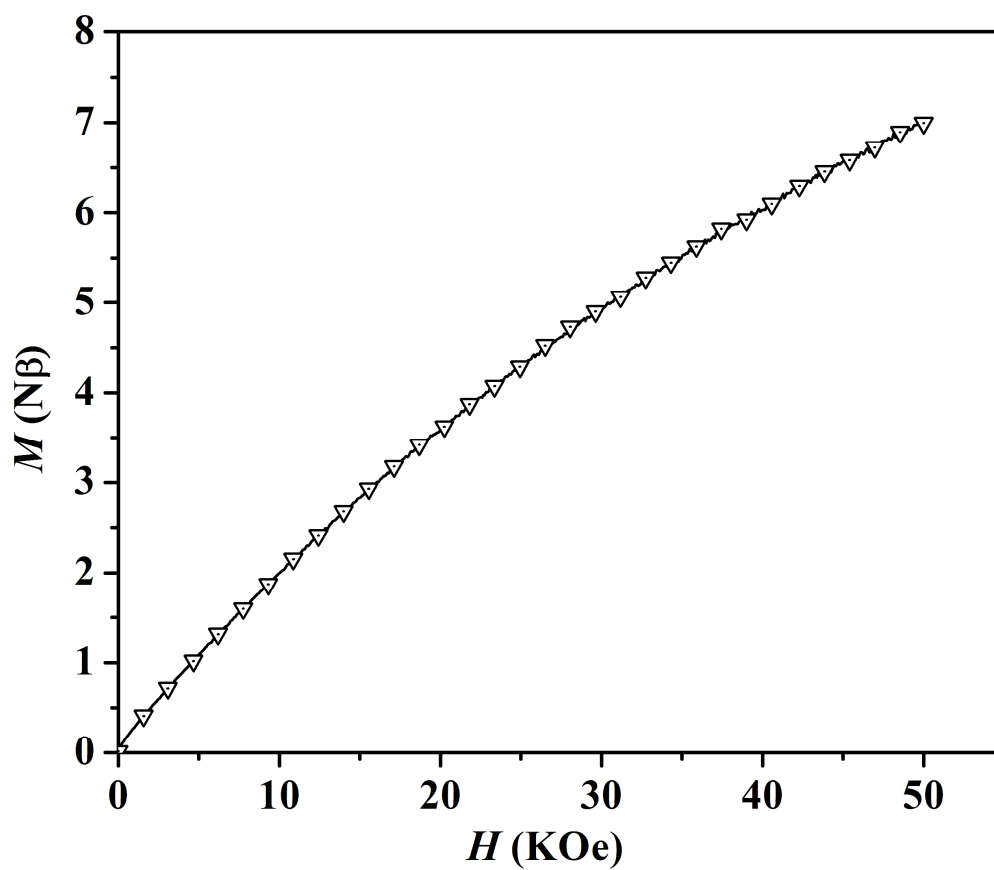

Fig. S8: Magnetization of **1** at 2.5 K up to 5 T.

Table S1: Hydrogen uptake of porous coordination framework (surface area  $\leq 1000 \text{ m}^2/\text{g}$ ) at 77 K and 1 atm.

| Compounds                                                                                           | Surface Area ( $\text{m}^2 \text{ g}^{-1}$ ) | H <sub>2</sub> uptake (wt %) | Conditions      | Ref.      |
|-----------------------------------------------------------------------------------------------------|----------------------------------------------|------------------------------|-----------------|-----------|
| [Pd(4-pymo) <sub>2</sub> ] <sub>n</sub>                                                             | 65                                           | 0.03                         | 77 K, 900 Torr  | [1]       |
| [Zn(ADC)(4,4'-bpe) <sub>0.5</sub> ] <sub>n</sub>                                                    | 100                                          | 0.62                         | 77 K, 1 atm     | [2]       |
| [Co(2,6-NDC)(4,4'-bpy) <sub>0.5</sub> ] <sub>n</sub>                                                | 115                                          | 0.72                         | 77 K, 1 atm     | [3]       |
| [Zn <sub>4</sub> O(H <sub>2</sub> O) <sub>3</sub> (adc) <sub>3</sub> ] <sub>n</sub>                 | 150                                          | 0.4                          | 77 K, 1 atm     | [4]       |
| This compound                                                                                       | 150                                          | 0.53                         | 77 K, 1 atm     | This work |
| [Mg <sub>3</sub> (2,6-NDC) <sub>3</sub> ] <sub>n</sub>                                              | 190                                          | 0.46                         | 77 K, 880 Torr  | [5]       |
| H <sub>2</sub> [Ni <sub>3</sub> O(H <sub>2</sub> O) <sub>3</sub> (TATB) <sub>2</sub> ] <sub>n</sub> | 225                                          | 0.63                         | 77 K, 760 Torr  | [6]       |
| [Mn(HCO <sub>2</sub> ) <sub>2</sub> ] <sub>n</sub>                                                  | 240                                          | 0.9                          | 78 K, 1 atm     | [7]       |
| [Mn <sub>3</sub> (BDT) <sub>3</sub> ] <sub>n</sub>                                                  | 290                                          | 0.97                         | 77 K, 880 Torr  | [8]       |
| [Zn <sub>2</sub> (CNC) <sub>2</sub> (DPT)] <sub>n</sub>                                             | 342                                          | 1.28                         | 77 K, 1 atm     | [9]       |
| [Cu(2-pymo) <sub>2</sub> ] <sub>n</sub>                                                             | 350                                          | 0.86                         | 77 K, 900 Torr  | [1]       |
| [Co <sub>3</sub> (BDC) <sub>3</sub> (dabco)] <sub>n</sub>                                           | 360                                          | 1.00                         | 77 K, 0.93 bar  | [10]      |
| [Zn <sub>3</sub> (NTB) <sub>2</sub> (EtOH) <sub>2</sub> ] <sub>n</sub>                              | 419                                          | 1.0                          | 77 K, 1 atm     | [11]      |
| [Cu <sub>2</sub> (TCPPDA)(H <sub>2</sub> O) <sub>2</sub> ] <sub>n</sub>                             | 627                                          | 1.4                          | 77 K, 1 atm     | [12]      |
| [Co <sub>3</sub> (2,4-pdc) <sub>2</sub> ( $\mu_3$ -OH) <sub>2</sub> ] <sub>n</sub>                  | 630                                          | 1.6                          | 77 K, 760 Torr  | [13]      |
| [Co <sub>2</sub> (6-mna) <sub>2</sub> ] <sub>n</sub>                                                | 420                                          | 0.67                         | 77 K, 760 Torr  | [13]      |
| [Mn <sub>2</sub> (BDT)Cl <sub>2</sub> ] <sub>n</sub>                                                | 530                                          | 0.82                         | 77 K, 880 Torr  | [8]       |
| Fe <sub>4</sub> [Fe(CN) <sub>6</sub> ] <sub>3</sub>                                                 | 550                                          | 1.2                          | 77 K, 890 Torr  | [14]      |
| Ni <sub>3</sub> [Co(CN) <sub>6</sub> ] <sub>2</sub>                                                 | 560                                          | 1.4                          | 77 K, 890 Torr  | [15]      |
| Ga[Co(CN) <sub>6</sub> ]                                                                            | 570                                          | 1.1                          | 77 K, 890 Torr  | [14]      |
| [Pd(2-pymo) <sub>2</sub> ] <sub>n</sub>                                                             | 600                                          | 1.29                         | 77 K, 900 Torr  | [1]       |
| [Co <sub>3</sub> (2,4-pdc) <sub>2</sub> ( $\mu_3$ -OH) <sub>2</sub> ] <sub>n</sub>                  | 630                                          | 1.6                          | 77 K, 760 Torr  | [13]      |
| [Fe <sub>3</sub> O(F <sub>4</sub> BDC) <sub>3</sub> (H <sub>2</sub> O) <sub>3</sub> ] <sub>n</sub>  | 635                                          | 0.9                          | 77 K, 1 bar     | [16]      |
| [Zn <sub>3</sub> (BDT) <sub>3</sub> ] <sub>n</sub>                                                  | 640                                          | 1.46                         | 77 K, 880 Torr  | [8]       |
| Zn <sub>3</sub> [Co(CN) <sub>6</sub> ] <sub>2</sub>                                                 | 720                                          | 1.4                          | 77 K, 890 Torr  | [15]      |
| [Cu <sub>2</sub> (L <sub>3</sub> )(H <sub>2</sub> O) <sub>2</sub> ] <sub>n</sub>                    | 733                                          | 0.8                          | 77 K, ~1 atm    | [17]      |
| Cu <sub>3</sub> [Co(CN) <sub>6</sub> ] <sub>2</sub>                                                 | 750                                          | 1.8                          | 77 K, 890 Torr  | [14]      |
| [Zn <sub>2</sub> (2,6-NDC) <sub>2</sub> (diPyNI)] <sub>n</sub> -Li <sup>+</sup>                     | 756                                          | 1.63                         | 77 K, 1 atm     | [18]      |
| Fe <sub>3</sub> [Co(CN) <sub>6</sub> ] <sub>2</sub>                                                 | 770                                          | 1.4                          | 77 K, 890 Torr  | [15]      |
| [Zn <sub>3</sub> (bpdc) <sub>3</sub> (4,4'-bpy)] <sub>n</sub>                                       | 792                                          | 1.74                         | 77 K, 1 atm     | [19]      |
| Zn(Pur) <sub>2</sub>                                                                                | 800                                          | 1.1                          | 77 K, ~800 Torr | [20]      |
| Co <sub>3</sub> [Co(CN) <sub>6</sub> ] <sub>2</sub>                                                 | 800                                          | 1.5                          | 77 K, 890 Torr  | [15]      |
| [Zn <sub>2</sub> (2,6-NDC) <sub>2</sub> (diPyNI)] <sub>n</sub>                                      | 802                                          | 0.93                         | 77 K, 1 atm     | [11]      |
| [Ni(cyclam)(bpydc)] <sub>n</sub>                                                                    | 817                                          | 1.1                          | 77 K, 1 atm     | [21]      |
| Mn <sub>3</sub> [Co(CN) <sub>6</sub> ] <sub>2</sub>                                                 | 870                                          | 1.6                          | 77 K, 890 Torr  | [15]      |
| [Zn <sub>2</sub> (tmBDC) <sub>2</sub> (dabco)] <sub>n</sub>                                         | 920                                          | 1.8                          | 78 K, 1 atm     | [22]      |

|                                                   |      |      |             |      |
|---------------------------------------------------|------|------|-------------|------|
| $[\text{Co}_3(\text{bpdc})_3(4,4'\text{-bpy})]_n$ | 922  | 1.98 | 77 K, 1 atm | [19] |
| $[\text{Zn}_2(\text{BDC})_2(4,4'\text{-bpy})]_n$  | 946  | 0.8  | 77 K, 1 atm | [23] |
| $[\text{Zn}_2(1,4\text{-NDC})_2(\text{dabco})]_n$ | 1000 | 1.7  | 78 K, 1 atm | [22] |

References:

- [1] J. A. R. Navarro, E. Barea, J. M. Salas, N. Masciocchi, S. Galli, A. Sironi, C. O. Ania and J. L. B. Parra, *Inorg. Chem.*, 2006, **45**, 2397.
- [2] B. Chen, S. Ma, E. J. Hurtado, E. B. Lobkovsky and H.-C. Zhou, *Inorg. Chem.*, 2007, **46**, 8490.
- [3] B. Chen, S. Ma, E. J. Hurtado, E. B. Lobkovsky, C. Liang, H. Zhu and S. Dai, *Inorg. Chem.*, 2007, **46**, 8705.
- [4] S. Ma, X.-S. Wang, C. D. Collier, E. S. Manis and H.-C. Zhou, *Inorg. Chem.*, 2007, **46**, 8499.
- [5] M. Dincă and J. R. Long, *J. Am. Chem. Soc.*, 2005, **127**, 9376.
- [6] S. Ma, X.-S. Wang, E. S. Manis, C. D. Collier and H.-C. Zhou, *Inorg. Chem.*, 2007, **46**, 3432.
- [7] D. N. Dybtsev, H. Chun, S. H. Yoon, D. Kim and K. Kim, *J. Am. Chem. Soc.*, 2004, **126**, 32.
- [8] M. Dincă, A. F. Yu and J. R. Long, *J. Am. Chem. Soc.*, 2006, **128**, 8904.
- [9] M. Xue, S. Ma, Z. Jin, R. M. Schaffino, G.-S. Zhu, E. B. Lobkovsky, S.-L. Qiu and B. Chen, *Inorg. Chem.*, 2008, **47**, 6825.
- [10] H. Chun, H. Jung, G. Koo, H. Jeong and D.-K. Kim, *Inorg. Chem.*, 2008, **47**, 5355.
- [11] M. P. Suh, Y. E. Cheon and E. Y. Lee, *Chem. Eur. J.*, 2007, **13**, 4208.
- [12] D. Sun, Y. Ke, T. M. Mattox, B. A. Ooro and H.-C. Zhou, *Chem. Commun.*, 2005, 5447.
- [13] S. M. Humphrey, J.-S. Chang, S. H. Jhung, J. W. Yoon and P. T. Wood, *Angew. Chem., Int. Ed.*, 2007, **46**, 272.
- [14] S. S. Kaye and J. R. Long, *Catalysis Today*, 2007, **120**, 311.
- [15] S. S. Kaye and J. R. Long, *J. Am. Chem. Soc.*, 2005, **127**, 6506.
- [16] J. H. Yoon, S. B. Choi, Y. J. Oh, M. J. Seo, Y. H. Jhon, T.-B. Lee, D. Kim, S. H. Choi and J. Kim, *Catalysis Today*, 2007, **120**, 324.
- [17] L. Ma, J. Y. Lee, J. Li and W. Lin, *Inorg. Chem.*, 2008, **47**, 3955.
- [18] K. L. Mulfort, J. T. Hupp, *J. Am. Chem. Soc.*, 2007, **129**, 9604.
- [19] J. Y. Lee, L. Pan, S. P. Kelly, J. Jagiello, T. J. Emge and J. Li, *Adv. Mater.*, 2005, **17**, 2703.
- [20] H. Hayashi, A. P. Côte, H. Furukawa, M. O'Keeffe and O. M. Yaghi, *Nature Mater.*, 2007, **6**, 501.
- [21] E. Y. Lee and M. P. Suh, *Angew. Chem., Int. Ed.*, 2004, **43**, 2798.
- [22] H. Chun, D. N. Dybtsev, H. Kim and K. Kim, *Chem. Eur. J.*, 2005, **11**, 3521.
- [23] B. Chen, C. Liang, J. Yang, D. S. Contreras, Y. L. Clancy, E. B. Lobkovsky and O. M. Yaghi, S. Dai, *Angew. Chem., Int. Ed.*, 2006, **45**, 1390.

**Table S2:** Bond Distances (Å) for  $\{[\text{Mn}_3(4,4'\text{-bipy})_3(\text{H}_2\text{O})_4][\text{Fe}(\text{CN})_6]_2 \cdot 2(4,4'\text{-bipy}) \cdot 3(\text{H}_2\text{O})\}_n$  (1)

|          |          |
|----------|----------|
| Fe1-C1   | 1.965(5) |
| Fe1-C2   | 1.928(5) |
| Fe1-C3   | 1.927(5) |
| Fe1-C4   | 1.946(5) |
| Fe1-C5   | 1.926(5) |
| Fe1-C1_i | 1.965(5) |
| Mn1-O1   | 2.200(4) |
| Mn1-N2   | 2.158(5) |
| Mn1-N6   | 2.269(3) |
| Mn1-N5_b | 2.182(5) |
| Mn1-N6_i | 2.269(3) |
| Mn2-O2   | 2.263(3) |
| Mn2-N3   | 2.178(5) |
| Mn2-N7   | 2.265(5) |
| Mn2-O2_a | 2.263(3) |
| Mn2-N3_a | 2.178(5) |
| Mn2-N7_f | 2.265(5) |

Symmetry code: a = 1-x,-y,z; b = 2-x,-y, z; g = 2-x,-y,1-z; i = x, y,1-z.

**Table S3:** Bond Angles (°) for  $\{[\text{Mn}_3(4,4'\text{-bipy})_3(\text{H}_2\text{O})_4][\text{Fe}(\text{CN})_6]_2 \cdot 2(4,4'\text{-bipy}) \cdot 3(\text{H}_2\text{O})\}_n$  (1).

|             |            |
|-------------|------------|
| C1-Fe1-C2   | 89.33(11)  |
| C1-Fe1-C3   | 90.10(10)  |
| C1-Fe1-C4   | 90.67(11)  |
| C1-Fe1-C5   | 89.90(10)  |
| C1-Fe1-C1_i | 178.65(15) |
| C2-Fe1-C3   | 88.5(2)    |
| C2-Fe1-C4   | 176.7(2)   |
| C2-Fe1-C5   | 91.4(2)    |

|               |            |
|---------------|------------|
| C1_i-Fe1-C2   | 89.33(11)  |
| C3-Fe1-C4     | 88.2(2)    |
| C3-Fe1-C5     | 179.89(12) |
| C1_i-Fe1-C3   | 90.10(10)  |
| C4-Fe1-C5     | 92.0(2)    |
| C1_i-Fe1-C4   | 90.67(11)  |
| C1_i-Fe1-C5   | 89.90(10)  |
| O1-Mn1-N2     | 175.78(16) |
| O1-Mn1-N6     | 88.13(8)   |
| O1-Mn1-N5_b   | 83.45(17)  |
| O1-Mn1-N6_i   | 88.13(8)   |
| N2-Mn1-N6     | 91.84(8)   |
| N2-Mn1-N5_b   | 92.34(19)  |
| N2-Mn1-N6_i   | 91.84(8)   |
| N5_b-Mn1-N6   | 89.40(8)   |
| N6-Mn1-N6_i   | 176.17(12) |
| N5_b-Mn1-N6_i | 89.40(8)   |
| O2-Mn2-N3     | 94.92(13)  |
| O2-Mn2-N7     | 90         |
| O2-Mn2-O2_a   | 180        |
| O2-Mn2-N3_a   | 85.08(13)  |
| O2-Mn2-N7_f   | 90         |
| N3-Mn2-N7     | 90         |
| O2_a-Mn2-N3   | 85.08 (13) |
| N3-Mn2-N3_a   | 180        |
| N3-Mn2-N7_f   | 90         |
| O2_a-Mn2-N7   | 90         |
| N3_a-Mn2-N7   | 90         |
| N7-Mn2-N7_f   | 180        |
| O2_a-Mn2-N3_a | 94.92(13)  |
| O2_a-Mn2-N7_f | 90         |
| N3_a-Mn2-N7_f | 90         |

Symmetry code a = 1-x,-y,z; b = 2-x,-y, z; g = 2-x,-y,1-z; i = x, y,1-z.
